# Supplementary material for: Diverse Banana Pseudostems and Rachis Are Distinctive for Edible Carbohydrates and Lignocellulose Saccharification towards High Bioethanol Production under Chemical and Liquid Hot Water Pretreatments
Source: MDPI journal article supplement (doi:10.3390/molecules26133870), 2021-06-24
Supplement: s1 [file s1]

**Table S1** Information of diverse banana crops for pseudostem and rachis collection.

| Samples* | Vernacular name     | Genetic group | Subgroup   | Origin location |
|----------|---------------------|---------------|------------|-----------------|
| PS-1     | Dwarf Brazilian     | ABB           | N/A        | Hawai'i         |
| PS-2     | Pisang Awak(Refen1) | ABB           | Saba       | China           |
| PS-3     | Baxi                | AAA           | Cavendish  | Australia       |
| PS-4     | Balbisiana          | balbisiana    | N/A        | China           |
| PS-5     | Acuminata           | acuminata     | Burmannica | Myanmar         |
| PS-6     | Pisang(Emperor)     | AA            | Inarnibal  | Philippines     |
| PS-7     | Red banana          | AAA           | Red        | China           |
| PS-8     | Thousand finger     | AAB           | N/A        | Malaysia        |
| PS-9     | Plantain            | AAB           | N/A        | China           |
| RC-2     | Pisang Awak(Refen1) | ABB           | Saba       | China           |
| RC-3     | Baxi                | AAA           | Cavendish  | Australia       |

\* PS: Pseudostems, RC: Rachis

**Table S2** Variations of bioethanol yields from yeast fermentation using hexoses released from enzymatic hydrolysis after 1% NaOH pretreatment and LHW (200 °C, 16 min) in banana samples

| Samples | 1% NaOH        |                                   | LHW (200 °C, 16 min) |                      |
|---------|----------------|-----------------------------------|----------------------|----------------------|
|         | Ethanol yields | Total ethanol yields <sup>a</sup> | Ethanol yields       | Total ethanol yields |
| PS-1    | 10.72          | 31.57                             | 12.64                | 29.70                |
| PS-2    | 14.43          | 38.38                             | 17.82                | 36.40                |
| PS-3    | 4.94           | 25.37                             | 9.03                 | 26.29                |
| PS-4    | 9.72           | 23.39                             | 12.87                | 28.26                |
| PS-5    | 8.68           | 29.98                             | 11.50                | 29.66                |
| PS-6    | 8.14           | 23.69                             | 10.50                | 23.52                |
| RC-2    | 11.37          | 34.32                             | 12.67                | 30.94                |
| RC-3    | 1.32           | 15.22                             | 5.22                 | 16.04                |

<sup>a</sup> Estimated total ethanol yields using all hexoses and pentoses obtained from soluble sugars, starch and lignocellulose enzymatic hydrolysis, based on the average xylose-ethanol conversation rate of 35% and glucose-ethanol conversation rate of 51% as previously reported by Rodrussamee et al. (2018) and Valinhas et al. (2018).
